# Supplementary material for: Factors predicting long-term outcomes of early-stage hepatocellular carcinoma after primary curative treatment: the role of surgical or nonsurgical methods
Source: PubMed Central journal article supplement (PMC7941925; doi:10.1186/s12885-021-07948-9), 2021-03-08

## Supporting information

Kuo MJ, Mo LR, Chen CL. Factors predicting long-term outcomes of early-stage hepatocellular carcinoma after primary curative treatment: The role of surgical or nonsurgical methods

**Table S1** Overall and tumor and liver reserve-specific relative hazards of disease-free survival and overall survival of HCC after curative treatment in association with treatment modalities with SR as reference strategy

**Figure S1** Comparison of survival curves of the patients with HCC in Barcelona Clinic Liver Cancer (BCLC) stage A HCC who underwent RFA-TACE or SR. (A) Cumulative OS curves of patients with HCC in BCLC A stage who underwent RFA-TACE and patients who underwent SR. (B) Cumulative DFS curves of patients with HCC in BCLC A stage who underwent RFA-TACE and patients who underwent SR. (C) After propensity score matching, the cumulative OS curves of patients with HCC in BCLC A stage who underwent RFA-TACE and patients who underwent SR. (D) After propensity score matching, the cumulative DFS curves of patients with HCC in BCLC A stage who underwent RFA-TACE and patients who underwent SR.

**Table S1** Overall and tumor and liver reserve- specific relative hazards of disease-free survival and overall survival of HCC after curative treatment in association with treatment modalities with SR as reference strategy

| Size and number      | No. of patients | Disease-free survival |                          | Overall survival     |                          |
|----------------------|-----------------|-----------------------|--------------------------|----------------------|--------------------------|
|                      | RFA-TACE/SR     | Crude HR<br>(95% CI)  | Adjusted HR*<br>(95% CI) | Crude HR<br>(95% CI) | Adjusted HR*<br>(95% CI) |
| <b>Size</b>          |                 |                       |                          |                      |                          |
| <3 cm                | 129/50          | 1.75(1.14-2.68)       | 1.49(0.95-2.35)          | 1.20(0.64-2.25)      | 1.08(0.53-2.17)          |
| ≥3cm                 | 47/75           | 1.35(0.84-2.17)       | 1.01(0.61-1.68)          | 1.39(0.73-2.65)      | 1.12(0.55-2.26)          |
| <b>Number</b>        |                 |                       |                          |                      |                          |
| Single               | 126/104         | 1.50(1.06-2.13)       | 1.37(0.94-1.98)          | 1.40(0.85-2.31)      | 1.38(0.79-2.39)          |
| Multinodularity      | 50/21           | 1.29(0.70-2.37)       | 1.09(0.55-2.13)          | 0.74(0.31-1.76)      | 0.72(0.26-1.96)          |
| <b>Staging</b>       |                 |                       |                          |                      |                          |
| BCLC 0               | 47/18           | 1.12(0.54-2.30)       | 1.09(0.50-2.36)          | 1.12(0.30-4.21)      | 1.03(0.26-4.05)          |
| BCLC A               | 129/107         | 1.77(1.27-2.46)       | 1.58(1.12-2.22)          | 1.37(0.88-2.15)      | 1.30(0.81-2.08)          |
| <b>CSPH</b>          |                 |                       |                          |                      |                          |
| No                   | 131/99          | 1.61(1.13-2.29)       | 1.23(0.83-1.82)          | 1.27(0.75-2.16)      | 1.21(0.65-2.27)          |
| Yes                  | 45/26           | 1.31(0.74-2.32)       | 1.23(0.62-2.45)          | 1.09(0.53-2.22)      | 1.01(0.43-2.39)          |
| <b>ALBI grade</b>    |                 |                       |                          |                      |                          |
| 1                    | 35/22           | 2.49(1.19-5.22)       | 2.13(0.88-5.16)          | 2.33(0.62-8.81)      | 2.43(0.50-11.8)          |
| 2/3                  | 141/101         | 1.41(1.02-1.95)       | 1.21(0.85-1.73)          | 1.16(0.74-1.81)      | 1.26(0.75-2.12)          |
| <b>FIB-4 index</b>   |                 |                       |                          |                      |                          |
| ≤3.25                | 88/77           | 0.80(0.41-1.56)       | 1.22(0.76-1.96)          | 1.60(1.03-2.49)      | 0.60(0.27-1.36)          |
| >3.25                | 88/48           | 1.39(0.91-2.14)       | 1.07(0.65-1.76)          | 1.47(0.82-2.63)      | 1.65(0.84-3.24)          |
| <b>HBV hepatitis</b> |                 |                       |                          |                      |                          |
| No                   | 17/21           | 1.41(0.50-3.96)       | 0.57(0.13-2.49)          | 0.98(0.18-5.35)      | 1.04(0.03-42.4)          |
| Yes                  | 70/65           | 1.54(0.99-2.39)       | 1.49(0.94-2.37)          | 1.38(0.71-2.69)      | 1.58(0.76-3.30)          |
| <b>HCV hepatitis</b> |                 |                       |                          |                      |                          |
| No                   | 17/21           | 1.41(0.50-3.96)       | 0.57(0.13-2.49)          | 0.98(0.18-5.35)      | 1.04(0.03-42.4)          |
| Yes                  | 82/36           | 1.08(0.68-1.71)       | 0.91(0.55-1.51)          | 0.76(0.40-1.43)      | 0.66(0.32-1.37)          |
| Overall              | 176/125         | 1.57(1.17-2.11)       | 1.29(0.93-1.79)          | 1.25(0.82-1.91)      | 1.19(0.73-1.93)          |

\*Based on Cox proportional hazard regression with adjustment for age, gender, tumor size, tumor number, portal hypertension, albumin level and etiologies of hepatitis.

CSPH: clinically significant portal hypertension; ALBI:albumin-bilirubin; HBV, hepatitis B virus; HCV, hepatitis C virus; BCLC, Barcelona-Clinic Liver Cancer staging system; RFA-TACE: Radiofrequency ablation with or without transcatheter arterial chemoembolization; SR: surgical resection.

**Figure S1.**

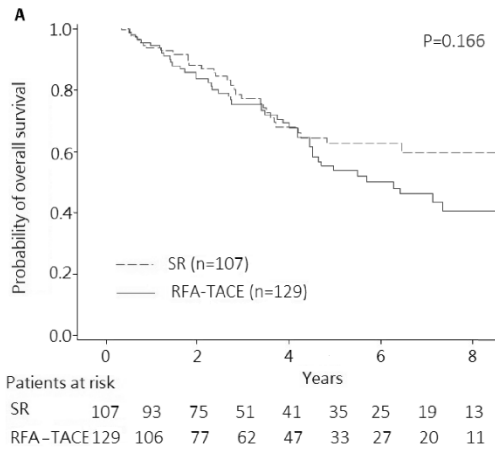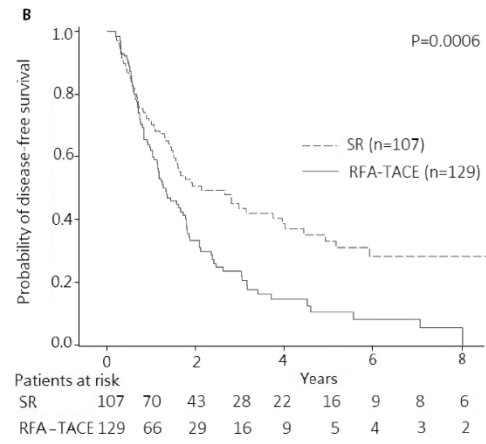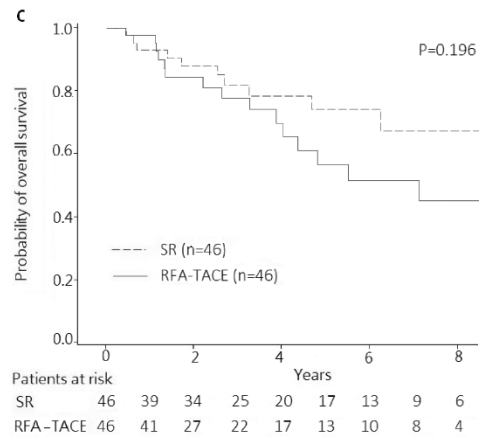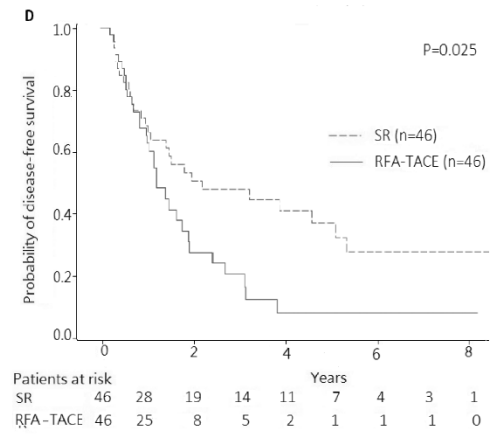

Supplement: 12885_2021_7948_MOESM1_ESM.pdf [file 12885_2021_7948_MOESM1_ESM.pdf]
